# Supplementary material for: Aphidius colemani Behavior Changes Depending on Volatile Organic Compounds Emitted by Plants Infected with Viruses with Different Modes of Transmission
Source: MDPI journal article supplement (doi:10.3390/insects15020092), 2024-01-29

## Supplementary material

**Table S1.** Treatments used in olfactometry assays. Statistical results regarding olfactometry assays are shown.

| n  | Treatment                              | Melon cv.      | Virus infection | Aphids infestation | Sex     | Election | No election | chi2  | df | p value       |
|----|----------------------------------------|----------------|-----------------|--------------------|---------|----------|-------------|-------|----|---------------|
| 1  | Control Healthy C311 Vs. Healthy Bazán | C311 and Bazán | no              | no                 | males   | 26       | 35          | 0.15  | 1  | 0.694         |
| 2  |                                        |                |                 |                    | females | 28       | 36          | 0     | 1  | 1             |
| 3  | Air Vs. Healthy Bazán                  | Bazán          | yes             | no                 | males   | 26       | 34          | 0.15  | 1  | 0.694         |
| 4  |                                        |                |                 |                    | females | 49       | 66          | 0.02  | 1  | 0.886         |
| 5  | CMV Air Vs. CMV                        | Bazán          | yes             | no                 | males   | 25       | 32          | 0.04  | 1  | 0.815         |
| 6  |                                        |                |                 |                    | females | 29       | 37          | 5.82  | 1  | <b>0.015</b>  |
| 7  | Mock Vs. CMV                           | Bazán          | yes             | no                 | males   | 20       | 26          | 0.2   | 1  | 0.654         |
| 8  |                                        |                |                 |                    | females | 14       | 50          | 0.61  | 1  | 0.434         |
| 9  | CABYV Air Vs. CABYV                    | Bazán          | yes             | no                 | males   | 21       | 28          | 1.19  | 1  | 0.275         |
| 10 |                                        |                |                 |                    | females | 21       | 24          | 0.42  | 1  | 0.512         |
| 11 | Mock Vs. CABYV                         | Bazán          | yes             | no                 | males   | 24       | 24          | 0.04  | 1  | 0.827         |
| 12 |                                        |                |                 |                    | females | 22       | 24          | 0.18  | 1  | 0.669         |
| 13 | Mixed Air Vs. mixed                    | Bazán          | yes             | no                 | males   | 23       | 26          | 0.39  | 1  | 0.531         |
| 14 |                                        |                |                 |                    | females | 29       | 33          | 12.44 | 1  | <b>0.0004</b> |
| 15 | Mock Vs. mixed                         | Bazán          | yes             | no                 | males   | 26       | 32          | 0.15  | 1  | 0.694         |
| 16 |                                        |                |                 |                    | females | 23       | 32          | 0.39  | 1  | 0.531         |
| 17 | Control Air Vs. Healthy C311           | C311           | yes             | no                 | males   | 23       | 28          | 1.08  | 1  | 0.297         |
| 18 |                                        |                |                 |                    | females | 20       | 25          | 3.2   | 1  | 0.07          |
| 19 | CMV Air Vs. CMV                        | C311           | yes             | no                 | males   | 21       | 25          | 5.76  | 1  | <b>0.016</b>  |
| 20 |                                        |                |                 |                    | females | 21       | 25          | 0.81  | 1  | 0.369         |
| 21 | Mock Vs. CMV                           | C311           | yes             | no                 | males   | 21       | 25          | 1.19  | 1  | 0.275         |
| 22 |                                        |                |                 |                    | females | 22       | 31          | 1.63  | 1  | 0.2           |
| 23 | CABYV Air Vs. CABYV                    | C311           | yes             | no                 | males   | 21       | 21          | 0.42  | 1  | 0.512         |
| 24 |                                        |                |                 |                    | females | 20       | 22          | 0.2   | 1  | 0.654         |
| 25 | Mock Vs. CABYV                         | C311           | yes             | no                 | males   | 20       | 25          | 0     | 1  | 1             |
| 26 |                                        |                |                 |                    | females | 27       | 31          | 0.9   | 1  | 0.335         |
| 27 | Mixed Air Vs. mixed                    | C311           | yes             | no                 | males   | 23       | 33          | 0.04  | 1  | 0.834         |
| 28 |                                        |                |                 |                    | females | 22       | 30          | 0.18  | 1  | 0.669         |
| 29 | Mock Vs. mixed                         | C311           | yes             | no                 | males   | 20       | 26          | 0.2   | 1  | 0.6547        |
| 30 |                                        |                |                 |                    | females | 22       | 26          | 0.18  | 1  | 0.669         |
| 31 | Control Healthy C311 Vs. Healthy Bazán | C311 and Bazán | no              | yes                | females | 31       | 40          | 5.45  | 1  | <b>0.02</b>   |
| 32 | Air Vs. Healthy Bazán                  | Bazán          | yes             | yes                | males   | 30       | 44          | 1.2   | 1  | 0.273         |
| 33 |                                        |                |                 |                    | females | 30       | 38          | 6.53  | 1  | <b>0.01</b>   |
| 34 | Healthy + aphids Vs. Healthy Bazán     | Bazán          | yes             | yes                | females | 31       | 40          | 7.25  | 1  | <b>0.007</b>  |
| 35 | CMV Air Vs. CMV                        | Bazán          | yes             | yes                | females | 31       | 40          | 0.81  | 1  | 0.369         |
| 36 | Mock Vs. CMV                           | Bazán          | yes             | yes                | females | 30       | 40          | 0.53  | 1  | 0.465         |
| 37 | CABYV Air Vs. CABYV                    | Bazán          | yes             | yes                | females | 33       | 40          | 1.48  | 1  | 0.223         |
| 38 | Mock Vs. CABYV                         | Bazán          | yes             | yes                | females | 48       | 60          | 8.02  | 1  | <b>0.004</b>  |
| 39 | CABYV + aphids Vs. CABYV               | Bazán          | yes             | yes                | females | 32       | 40          | 0.12  | 1  | 0.723         |
| 40 | Mixed Air Vs. mixed                    | Bazán          | yes             | yes                | females | 31       | 40          | 0.03  | 1  | 0.857         |
| 41 | Mock Vs. mixed                         | Bazán          | yes             | yes                | females | 30       | 40          | 0.13  | 1  | 0.715         |
| 42 | Control Air Vs. Healthy C311           | C311           | yes             | yes                | males   | 32       | 44          | 1.12  | 1  | 0.288         |
| 43 |                                        |                |                 |                    | females | 34       | 40          | 11.76 | 1  | <b>0.0006</b> |
| 44 | Healthy + aphids Vs. Healthy C311      | C311           | yes             | no                 | females | 48       | 57          | 3     | 1  | 0.08          |
| 45 | CMV Air Vs. CMV                        | C311           | yes             | yes                | females | 36       | 40          | 5.44  | 1  | <b>0.01</b>   |
| 46 | Mock Vs. CMV                           | C311           | yes             | yes                | females | 39       | 49          | 3.1   | 1  | 0.007         |
| 47 | CABYV Air Vs. CABYV                    | C311           | yes             | yes                | females | 42       | 50          | 6.09  | 1  | <b>0.013</b>  |
| 48 | Mock Vs. CABYV                         | C311           | yes             | yes                | females | 40       | 50          | 0.9   | 1  | 0.342         |
| 49 | CABYV c311 Vs. CABYV Bazán             | C311 and Bazán | yes             | yes                | females | 33       | 41          | 0.87  | 1  | 0.601         |
| 50 | CABYV + aphids Vs. CABYV               | C311           | yes             | yes                | females | 31       | 56          | 0.03  | 1  | 0.857         |
| 51 | Mixed Air Vs. mixed                    | C311           | yes             | yes                | females | 42       | 50          | 6.09  | 1  | <b>0.013</b>  |
| 52 | Mock Vs. mixed                         | C311           | yes             | yes                | females | 40       | 50          | 0.9   | 1  | 0.342         |

**Figure S1. Treatment photos used in olfactometry assays using both varieties of melon.**

|                                                                                     |  |
|-------------------------------------------------------------------------------------|--|
| <b>Cv. Bazán, treatment: Mock (left) Vs. CMV (right)</b>                            |  |
|    |  |
| <b>Cv. Bazán, treatment: Mock (left) Vs. CABYV (right)</b>                          |  |
|   |  |
| <b>Cv. Bazán, treatment: Mock (left) Vs. Mix (right)</b>                            |  |
|  |  |
| <b>C311, treatment: Mock (left) Vs. CMV (right)</b>                                 |  |

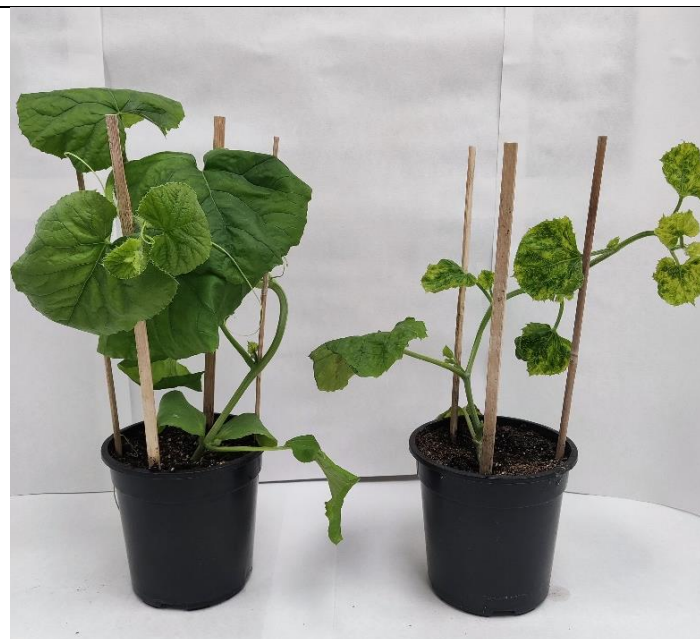

**C311, treatment: Mock (left) Vs. CABYV (right)**

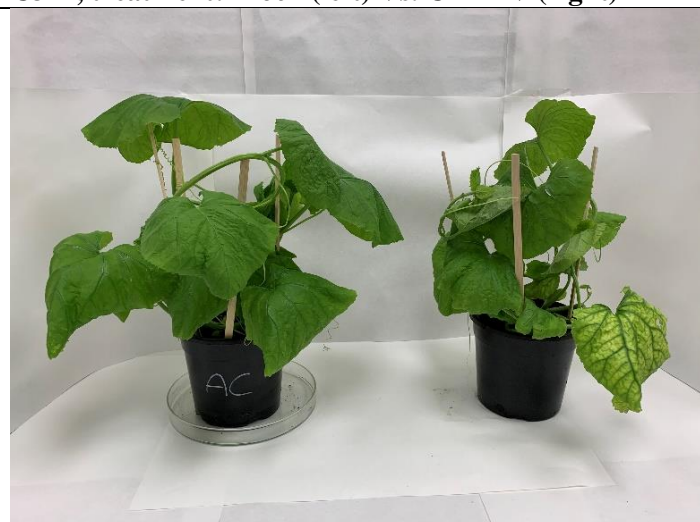

**C311, treatment: Mock (left) Vs. Mix (right)**

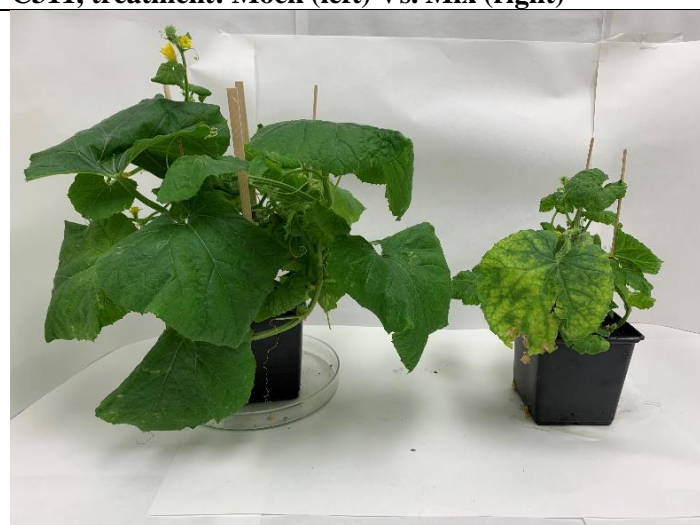

**Healthy cv. Bazán Vs. healthy C311**

*Aphidius colemani* behavior Changes Depending on Volatile Organic Compounds Emitted by Plants Infected with Viruses with Different Modes of Transmission. Clemente-Orta, G., Cabello, A., Garzo, E., Moreno, A., Fereres, A.

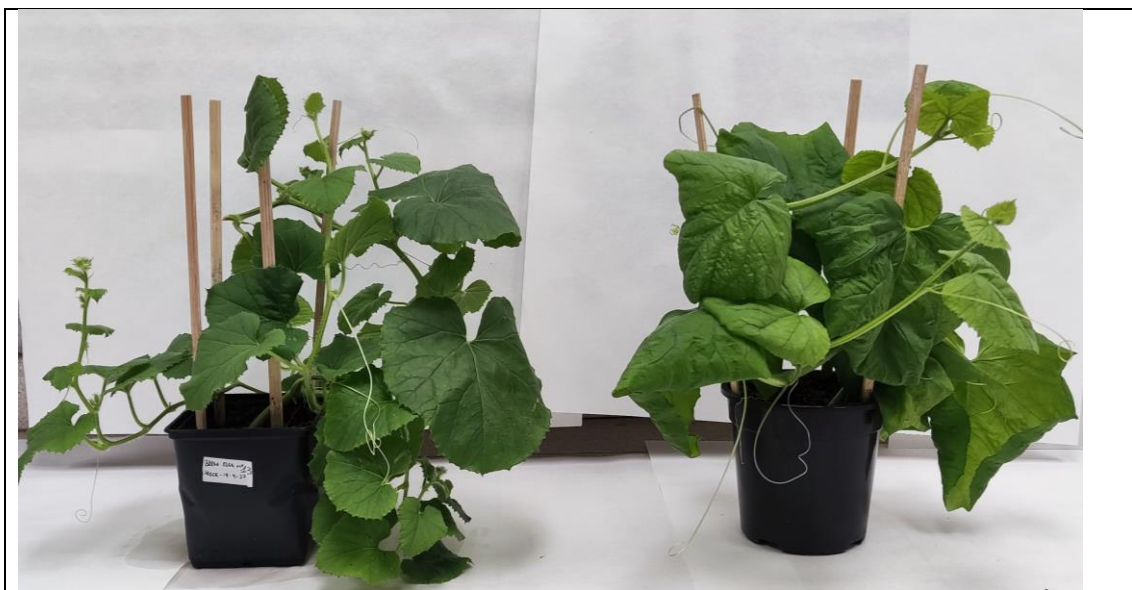

Supplement: s1 [file s1]
